# Supplementary material
Source: Elsevier journal article supplement (https://www.sciencedirect.com/science/article/pii/S0870255121004674)
Supplement: mmc8 [file S0870255121004674:mmc8.doc]

**IMPLANT PROCEDURE**

1. Gained access via femoral vein using 12 F sheath.
2. Performed right heart catheterization using balloon wedge-pressure catheter (BWPC) **(Video 1).**
3. Identified target implant site by angiogram through the BWPC distal lumen (automatic contrast injection of 6 cc of radiographic contrast, using a Y-connector) with the balloon inflated. Performed an AP and 45 degree RAO or LAO angiogram **(Video 2)**.
4. Identified target vessel using BWPC as a reference (BWPC is 2.3 mm in diameter): ≥ 7 mm diameter where distal loop will be placed **(Figure 1)**.
5. Introduced the 0.018 guidewire (GW) through the BWPC and advanced 5–6 cm beyond target location **(Video 3)**.
6. Removed the BWPC, while maintaining the GW position **(Video 4)**.
7. Flushed delivery catheter lumen at hub with saline and carefully swirled sensor (distal end of catheter) in bowl of saline for 10 seconds to activate hydrophilic coating prior to advancing on GW.
8. Loaded the delivery catheter over the GW, introduced through the sheath and advanced to target implant site **(Video 5)**.
9. Deploy sensor: Once in target position, under fluoroscopy, unscrewed the blue cap on the hub, then retracted cap and removed the wires completely from the delivery catheter **(Video 6)**.
10. Under fluoroscopy, *slowly and gently* removed the delivery catheter, and then the GW **(Video 7)**.
11. Using fluoroscopy as a guide, reinserted the BWPC into the main pulmonary artery (PA) or right pulmonary artery. Contact between the BWPC and the sensor was avoided. New measurements of PA pressures were obtained for calibration.


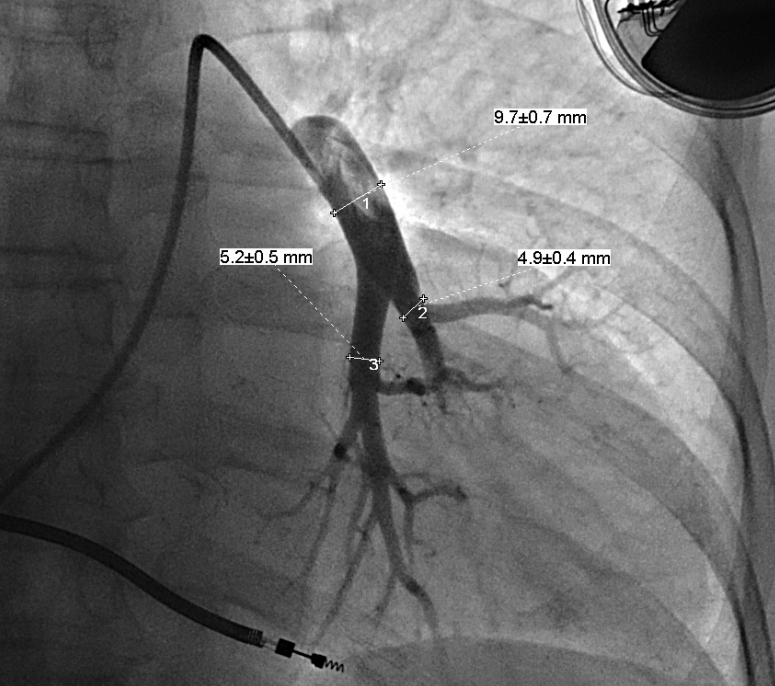


**Figure 1** Measurement of the target vessel and principal branches
